# Supplementary material
Source: Springer Nature journal article supplement (https://www.springermedizin.de/resource/supplementary/12943_2013_1161_MOESM4_ESM.pdf/9552632)

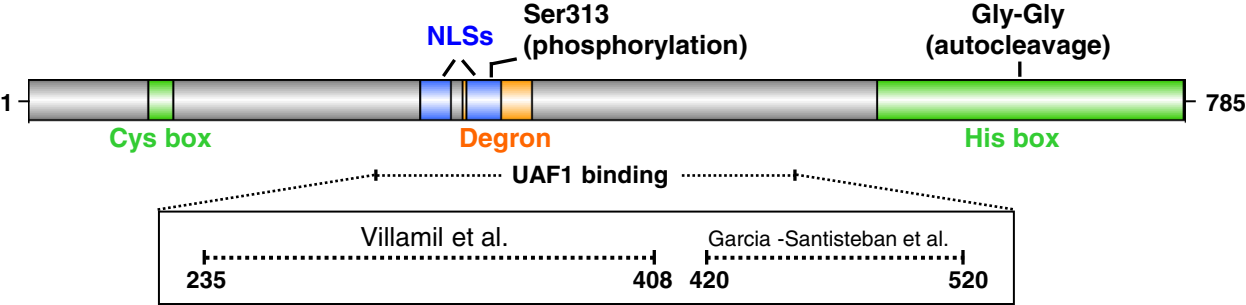

Supplement: MOESM4 [file 9552632]
